# Supplementary material for: miR-708-5p targets oncogenic prostaglandin E2 production to suppress a pro-tumorigenic phenotype in lung cancer cells
Source: PubMed Central journal article supplement (PMC7335672; doi:10.18632/oncotarget.27614), 2020-06-30
Supplement: oncotarget-11-2464-s001.pdf [file oncotarget-11-2464-s001.pdf]

## miR-708-5p targets oncogenic prostaglandin E2 production to suppress a pro-tumorigenic phenotype in lung cancer cells

### SUPPLEMENTARY MATERIALS

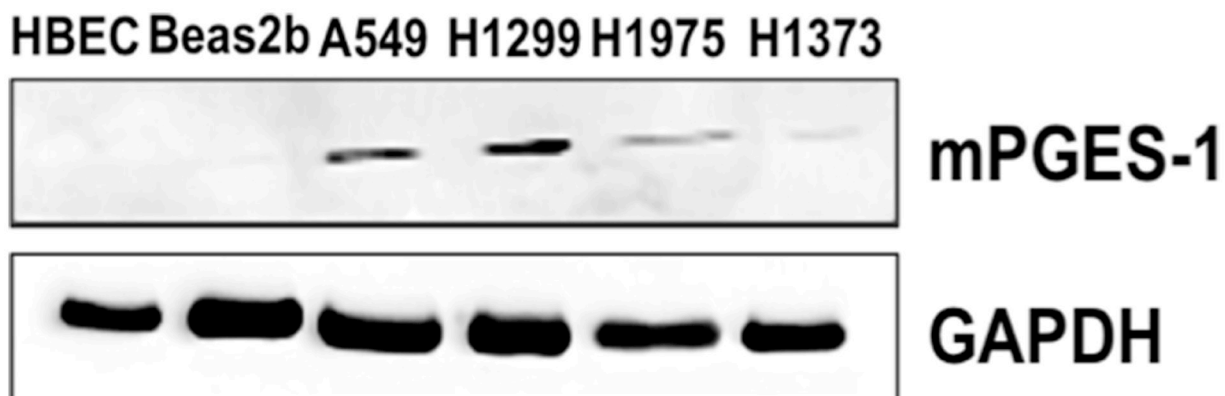

**Supplementary Figure 1: mPGES-1 is overexpressed in lung cancer cell lines.** Western blot analysis of baseline mPGES-1 protein levels in non-cancerous (HBEC, Beas2b) and cancerous (A549, H1299, H1975, H1373) lung cell lines. GAPDH served as a loading control. All western blots are representative of 3 independent experiments.

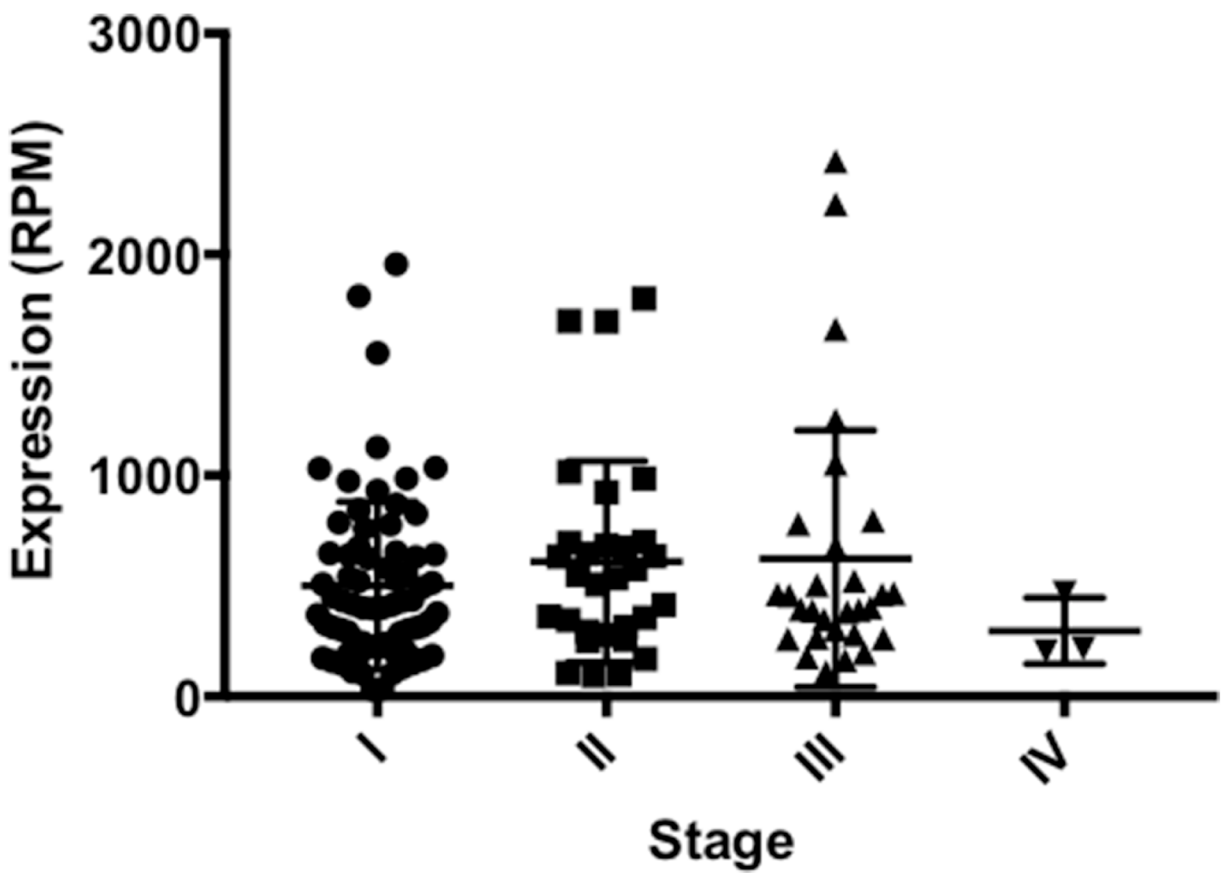

**Supplementary Figure 2: miR-708 expression is not associated with lung TNM stage.** Box plot from TCGA data measuring the mean expression of miR-708 by tumor-node metastasis (TNM) stage in LUSC patients. Stage I:  $n = 72$ , Stage II:  $n = 30$ , Stage III:  $n = 29$ , Stage IV:  $n = 3$ .

**A**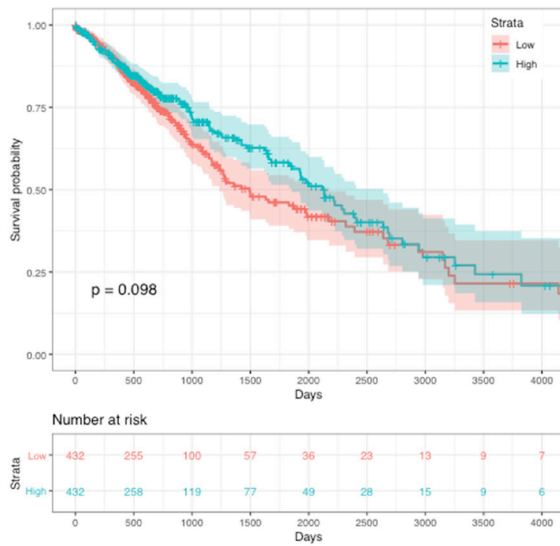**B**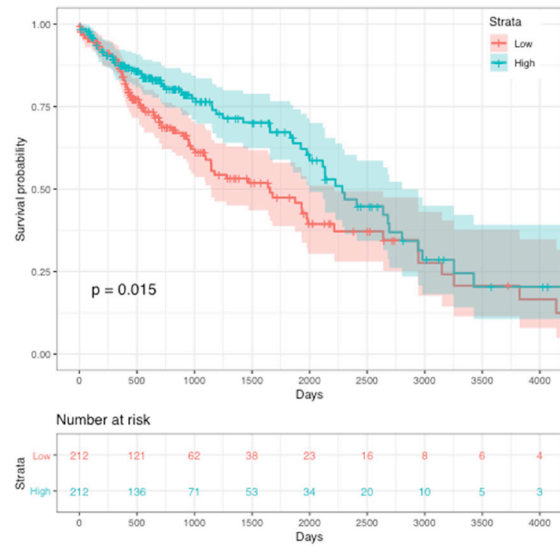**C**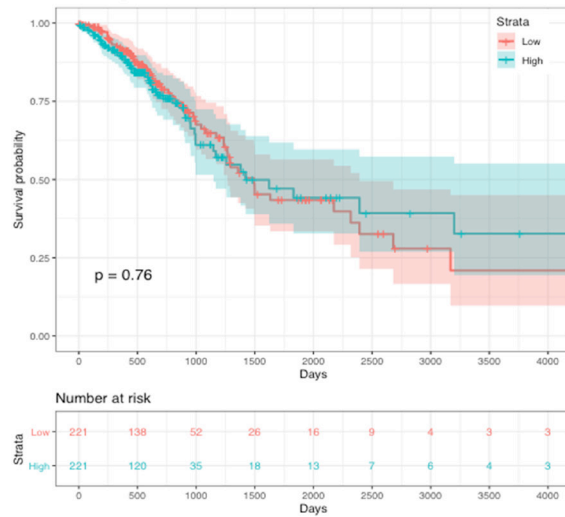

**Supplementary Figure 3: ODZ4 mRNA expression is associated with increased survival rates in LUSC patients and phenocopies miR-708.** Kaplan–Meier plots from TCGA data measuring the effects of high (blue) or low (red) *ODZ4* mRNA expression in (A) NSCLC ( $p = .0905$ ,  $n = 864$ ), (B) LUSC ( $p = .015$ ,  $n = 424$ ), and (C) LUAD ( $p = .76$ ,  $n = 442$ ) on patient survival rates. The bottom of each graph indicates the number of patients at risk for each time point.

**A**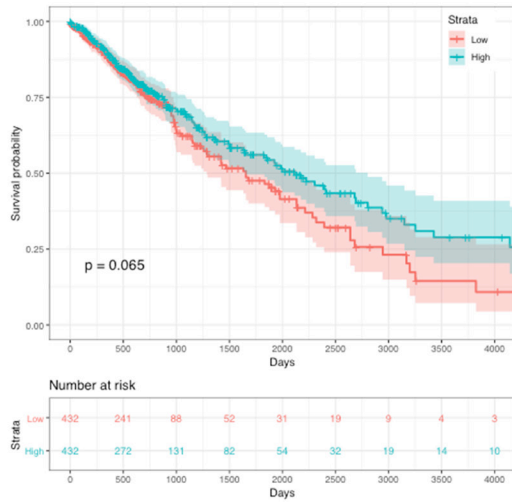**B**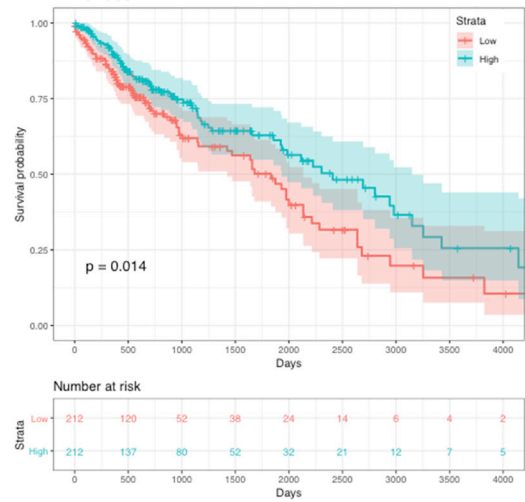**C**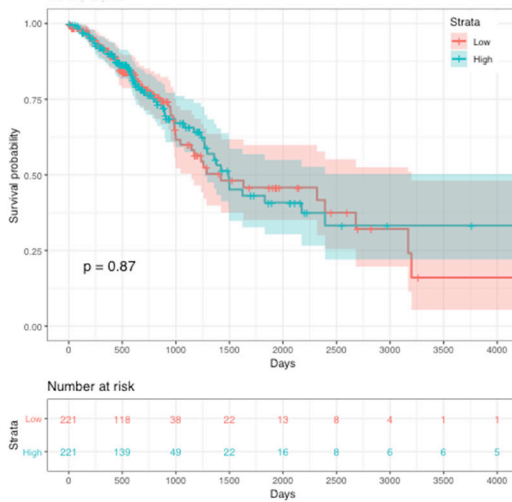

**Supplementary Figure 4: CHOP mRNA expression is associated with increased survival rates in LUSC patients.** Kaplan–Meier plots from TCGA data measuring the effects of high (blue) or low (red) CHOP mRNA expression in (A) NSCLC ( $p = .065$ ,  $n = 864$ ), (B) LUSC ( $p = .014$ ,  $n = 424$ ), and (C) LUAD ( $p = .87$ ,  $n = 442$ ) on patient survival rates. The bottom of each graph indicates the number of patients at risk for each time point.

**Supplementary Table 1: miR-708 expression correlates with known miR-708 regulators in lung cancer tumors**

| Gene                        | miRNA   | NSCLC         |                  | LUAD             |                | LUSC           |                    |
|-----------------------------|---------|---------------|------------------|------------------|----------------|----------------|--------------------|
|                             |         | Correlation   | <i>p</i> value   | Correlation      | <i>p</i> value | Correlation    | <i>p</i> value     |
| <i>CHOP</i> <sup>^</sup>    | miR-708 | 0.207         | 2.181E-11        | <b>0.0445</b>    | <b>0.3085</b>  | 0.188          | 0.00002323         |
| <i>GRα</i> <sup>^</sup>     | miR-708 | <b>-0.236</b> | <b>1.825E-14</b> | <b>-0.0579</b>   | <b>0.1851</b>  | <b>-0.203</b>  | <b>0.000004526</b> |
| <i>MYC</i> <sup>^</sup>     | miR-708 | 0.333         | 4.618E-28        | <b>-0.000522</b> | <b>0.9905</b>  | 0.167          | 0.0001741          |
| <i>E2F1</i> <sup>^</sup>    | miR-708 | 0.119         | 0.000132         | 0.13             | 0.002744       | 0.106          | 0.01712            |
| <i>CTBP2</i> <sup>*</sup>   | miR-708 | <b>-0.19</b>  | <b>8.999E-10</b> | <b>0.0799</b>    | <b>0.06715</b> | <b>-0.0134</b> | <b>0.7638</b>      |
| <i>RAD21</i> <sup>^</sup>   | miR-708 | 0.206         | 2.502E-11        | 0.15             | 0.0005638      | 0.154          | 0.0005529          |
| <i>C/EBP-β</i> <sup>^</sup> | miR-708 | <b>-0.271</b> | <b>8.746E-19</b> | <b>0.0728</b>    | <b>0.09539</b> | <b>-0.382</b>  | <b>6.762E-19</b>   |
| <i>CTCF</i> <sup>*</sup>    | miR-708 | 0.16          | 2.434E-07        | <b>-0.0445</b>   | <b>0.3086</b>  | 0.0894         | 0.04538            |

TCGA mRNA/miRNA data showing correlation, and significance (*p* value) of miR-708 and various validated regulators of miR-708 expression in NSCLC (*n* = 864), LUAD (*n* = 442), and LUSC (*n* = 424) tumors. ***Bold italic*** font indicates a significant negative correlation; *italic* font represents a significant positive correlation; **bold** font indicates no significant correlation. (ˆ) represents a positive regulator of miR-708 expression, while (\*) represents a repressor of miR-708 expression.

**Supplementary Table 2: Significant correlations between miR-708 and AA pathway mRNA gene expression in LUSC tumors**

**A**

| <b>Significant Negative Correlation</b> |              |                    |                           |                       |
|-----------------------------------------|--------------|--------------------|---------------------------|-----------------------|
| <b>Gene</b>                             | <b>miRNA</b> | <b>Correlation</b> | <b>Adj. R<sup>2</sup></b> | <b><i>p</i> value</b> |
| 15-LOX                                  | miR-708      | -0.195             | 0.0361                    | 1.10E-05              |
| 5-LO                                    | miR-708      | -0.347             | 0.118                     | 1.27E-15              |
| COX-1                                   | miR-708      | -0.279             | 0.0758                    | 2.13E-10              |
| COX-2                                   | miR-708      | -0.0916            | 0.00641                   | 0.04018               |
| CYSLTR                                  | miR-708      | -0.208             | 0.0412                    | 2.69E-06              |
| FLAP                                    | miR-708      | -0.337             | 0.111                     | 9.34E-15              |
| LTA4H                                   | miR-708      | -0.299             | 0.0874                    | 8.37E-12              |
| LTC4S                                   | miR-708      | -0.328             | 0.106                     | 4.28E-14              |
| mPGES-1                                 | miR-708      | -0.126             | 0.0139                    | 0.004761              |
| PTGDR                                   | miR-708      | -0.242             | 0.0565                    | 4.23E-08              |
| PTGDS                                   | miR-708      | -0.257             | 0.064                     | 5.44E-09              |
| PTGER1                                  | miR-708      | -0.164             | 0.025                     | 0.0002207             |
| PTGER2                                  | miR-708      | -0.301             | 0.0887                    | 5.88E-12              |
| PTGER4                                  | miR-708      | -0.111             | 0.0104                    | 0.01261               |
| PTGIR                                   | miR-708      | -0.274             | 0.073                     | 4.49E-10              |
| PTGIS                                   | miR-708      | -0.279             | 0.0758                    | 2.13E-10              |
| TBXAS1                                  | miR-708      | -0.357             | 0.126                     | 1.45E-16              |

**B**

| <b>Significant Positive Correlation</b> |              |                    |                           |                       |
|-----------------------------------------|--------------|--------------------|---------------------------|-----------------------|
| <b>Gene</b>                             | <b>miRNA</b> | <b>Correlation</b> | <b>Adj. R<sup>2</sup></b> | <b><i>p</i> value</b> |
| mPGES-2                                 | miR-708      | 0.155              | 0.0221                    | 0.0004902             |
| LTB4R2                                  | miR-708      | 0.0974             | 0.0075                    | 0.02918               |
| cPGES                                   | miR-708      | 0.199              | 0.0377                    | 7.09E-06              |
| 12-LOX                                  | miR-708      | 0.142              | 0.0182                    | 0.001421              |

TCGA mRNA/miRNA data displaying correlation, adjusted R<sub>2</sub>, and significance for miR-708 vs AA pathway genes in LUSC tumor ( $n = 424$ ). Supplementary Table 1 (A) indicates genes significantly negatively correlated with miR-708 expression, while (B) shows genes significantly positively correlated with miR-708 expression.
